# Supplementary material for: Low-voltage organic single-crystal field-effect transistors and inverters enabled by a solution processable high-kdielectric
Source: Royal Society of Chemistry journal article supplement (doi:10.1039/d3tc00246b), 2023-01-01
Supplement: d3tc00246b1.pdf [file d3tc00246b1.pdf]

## Electronic Supplementary Information

### Low-voltage organic single-crystal field-effect transistors and inverters enabled by a solution processable high-*k* dielectric

Chunli Ma,<sup>‡a</sup> Bin Li,<sup>‡a</sup> Yihan Zhang,<sup>‡a</sup> Jiamin Wang,<sup>a</sup> Ying Liu,<sup>a</sup> Lingjie Sun,<sup>a,b</sup> Xinzi Tian,<sup>a</sup> Jiarong Yao,<sup>a</sup> Zhaofeng Wang,<sup>a</sup> Shuyu Li,<sup>a</sup> Fangxu Yang,<sup>\*a</sup> Rongjin Li,<sup>\*a</sup> and Wenping Hu<sup>a,b</sup>

<sup>a</sup> Tianjin Key Laboratory of Molecular Optoelectronic Sciences, Department of Chemistry, School of Science, Tianjin University, Tianjin 300072, China. E-mail: yangfangxu@tju.edu.cn, lirj@tju.edu.cn.

<sup>b</sup> Joint School of National University of Singapore and Tianjin University, Fuzhou International Campus of Tianjin University, Binhai New City, Fuzhou, 350207, China.

#### 1. Tables S1 to S3

#### 2. Figures S1 to S14

#### 3. References

## 1. Table S1 to S3

**Table S1** Mobility comparison of recently reported low-voltage OFETs based on high-*k* dielectrics and OTS-modified SiO<sub>2</sub> dielectrics for the same semiconductor, respectively.

| Ref. <sup>a</sup> | Dielectric               | OSC           | $\mu$<br>[cm <sup>2</sup> V <sup>-1</sup><br>s <sup>-1</sup> ] | $\mu_0$<br>[cm <sup>2</sup> V <sup>-1</sup><br>s <sup>-1</sup> ] | Mobility reduction | Ref. <sup>b</sup> |
|-------------------|--------------------------|---------------|----------------------------------------------------------------|------------------------------------------------------------------|--------------------|-------------------|
| 1                 | AlO <sub>x</sub> /C14 PA | DPA           | 1.2                                                            | 34                                                               | 96.5 %             | 10                |
| 2                 | TiO <sub>x</sub>         | Pentacene     | 0.12                                                           | 3                                                                | 96.0 %             | 11                |
| 3                 | AlO <sub>x</sub>         | C10-DNTT      | 1.8                                                            | 8                                                                | 98.0 %             | 12                |
| 4                 | AlO <sub>x</sub> /PS     | C8-BTBT       | 3.8                                                            | 8.7                                                              | 56.3 %             | 13                |
| 5                 | ZrTiO <sub>x</sub> /PS   | Pentacene     | 0.55                                                           | 3                                                                | 81.7 %             | 11                |
| 7                 | HfO <sub>2</sub> /COC    | PTCDI-C13     | 0.27                                                           | 2.1                                                              | 87.1 %             | 14                |
| 7                 | HfO <sub>2</sub> /COC    | Pentacene     | 0.47                                                           | 3                                                                | 84.3 %             | 11                |
| 8                 | HfO <sub>2</sub> /π-σ PA | Pentacene     | 0.22                                                           | 3                                                                | 92.7 %             | 11                |
| 9                 | ZrO <sub>x</sub> /PαMS   | Pentacene     | 0.51                                                           | 3                                                                | 83.0 %             | 11                |
| <b>This work</b>  | <b>HAO/ODPA</b>          | <b>C6-DPA</b> | <b>3.0</b>                                                     | 3.16                                                             | 5.1 %              | 15                |

<sup>a</sup> References based on high-*k* dielectrics.

<sup>b</sup> References based on SiO<sub>2</sub> dielectric.

$\mu_0$ : Comparative mobility, i.e., mobility calculated from OFETs based on OTS/SiO<sub>2</sub> dielectrics

$\mu$ : Mobility calculated from OFETs based on high-*k* dielectrics

Mobility reduction:  $(\mu_0 - \mu) / \mu_0 * 100\%$

**Table S2** Comparison of electrical characteristics of recently reported low voltage OFETs based on high-*k* dielectrics.

| Ref.                 | Dielectric             | Method         | OSC            | <i>SS</i><br>[mV<br>dec <sup>-1</sup> ] | $\mu$<br>[cm <sup>2</sup> V <sup>-1</sup> s <sup>-1</sup> ] | On/Off<br>Ratio       | <i>D<sub>it</sub></i><br>[×10 <sup>-11</sup><br>eV <sup>-1</sup> cm <sup>-2</sup> ] |
|----------------------|------------------------|----------------|----------------|-----------------------------------------|-------------------------------------------------------------|-----------------------|-------------------------------------------------------------------------------------|
| 1                    | AlO <sub>x</sub> /SAM  | Anodization    | DPA            | 66                                      | 1.2                                                         | 4×10 <sup>6</sup>     | 2.09                                                                                |
| 2                    | TiO <sub>x</sub>       | Sol-Gel        | Pentacene      | 180                                     | 0.12                                                        | 10 <sup>4</sup>       | 76.1                                                                                |
| 3                    | AlO <sub>x</sub>       | Sol-Gel        | C10-DNTT       | 110                                     | 1.8                                                         | 10 <sup>5</sup>       | 9.65                                                                                |
| 4                    | AlO <sub>x</sub> /PS   | Anodization    | C8-BTBT        | 107                                     | 1.53                                                        | 10 <sup>8</sup>       | 8.78                                                                                |
| 5                    | ZrTiO <sub>x</sub> /PS | Sol-Gel        | Pentacene      | 510                                     | 0.55                                                        | 10 <sup>4</sup>       | 52.3                                                                                |
| 6                    | HfO <sub>2</sub> /SAM  | Sol-Gel        | PDPP2DT-<br>T2 | 230                                     | 1.16                                                        | 7×10 <sub>4</sub>     | 114                                                                                 |
| 7                    | HfO <sub>2</sub> /COC  | Sol-Gel        | Pentacene      | 450                                     | 0.47                                                        | 6×10 <sub>4</sub>     | 45.8                                                                                |
| 7                    | HfO <sub>2</sub> /COC  | Sol-Gel        | PTCDI-C13      | 310                                     | 0.27                                                        | 4×10 <sub>3</sub>     | 36.4                                                                                |
| 8                    | HfO <sub>2</sub> /SAM  | Sol-Gel        | Pentacene      | 100                                     | 0.22                                                        | 10 <sup>6</sup>       | 29.7                                                                                |
| 9                    | ZrO <sub>x</sub> /PαMS | Sol-Gel        | Pentacene      | 260                                     | 0.51                                                        | 1.2×10 <sup>5</sup>   | 37.3                                                                                |
| <b>This<br/>work</b> | <b>HAO/SAM</b>         | <b>Sol-Gel</b> | <b>C6-DPA</b>  | <b>60</b>                               | <b>3.0</b>                                                  | <b>10<sup>7</sup></b> | <b>0.181</b>                                                                        |

**Table S3** Comparison of the performances of recently reported organic inverters operating at low voltages.

| Ref.             | Dielectric                           | OSC<br>(p-type, n-type)                           | Operating<br>voltage (V) | Gain       |
|------------------|--------------------------------------|---------------------------------------------------|--------------------------|------------|
| 16               | Hf-SAND                              | PBTOR, P(NDI2OD-T2)                               | 4                        | 38         |
| 17               | pV3D3                                | DNTT, PTCDI-C13                                   | 5                        | 131        |
| 18               | HfTiO <sub>x</sub> /SAM              | Pentacene, PTCDI-C13                              | 3                        | 6          |
| 19               | AlO <sub>x</sub> /SAM                | DNTT, PDI-8CN2                                    | 3                        | 63         |
| 20               | TiO <sub>2</sub> /SAM                | DNTT, PDI-8CN2                                    | 0.9                      | 62         |
| 21               | AlO <sub>x</sub> /SAM                | DPh-BTBT, N1100                                   | 1                        | 180        |
| 22               | HfO <sub>2</sub> /Polyimide          | Pentacene, PTCDI-C13                              | 8                        | 46         |
| 23               | Parylene-C/PMMA                      | 29-DPP-TVT,P(NDI2OD-T2)                           | 10                       | 13         |
| 24               | Parylene                             | diF-TES-ADT:PS,TU-3:PaMS                          | 10                       | 25         |
| 25               | AlO <sub>x</sub> /PADMA              | C <sub>8</sub> -DNBDT-NW, PhC <sub>2</sub> -BQQDI | 1                        | 66         |
| 26               | Al <sub>2</sub> O <sub>3</sub> /TMSC | Pentacene, C60                                    | 4                        | 500        |
| 27               | C nanoparticles (NPs)/PS             | Pentacene, PTCDI-C13H27                           | 1.5                      | 500        |
| 28               | Ta <sub>2</sub> O <sub>5</sub>       | Pentacene, PTCDI-C13                              | 5                        | 500        |
| 29               | AlO <sub>x</sub> /SAM                | DNTT, Compound 8                                  | 3                        | 370        |
| <b>This work</b> | <b>HAO/SAM</b>                       | <b>C6-DPA, TFT-CN</b>                             | <b>4</b>                 | <b>172</b> |

## 2. Figure S1 to S14

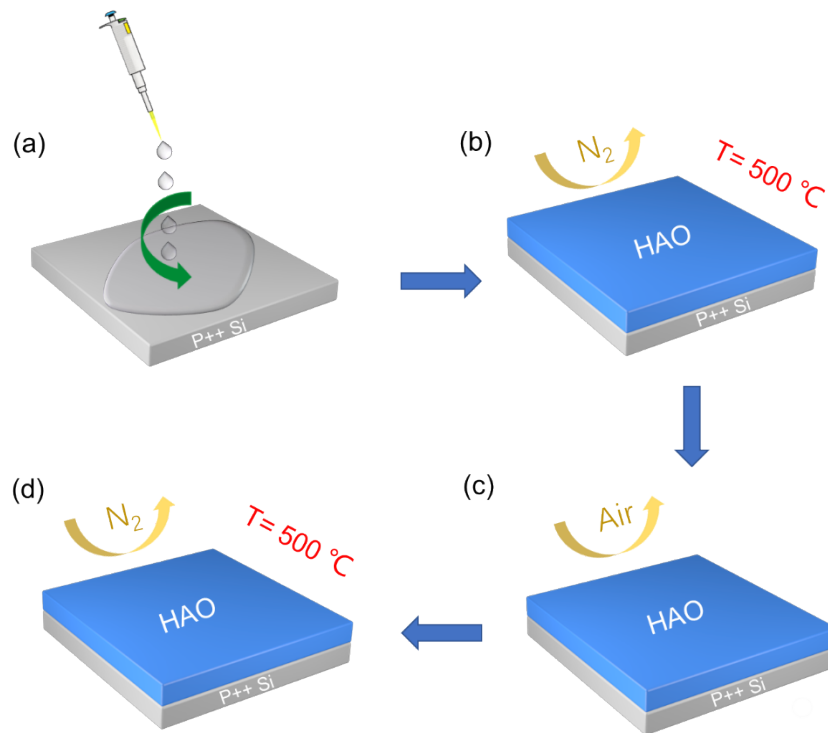

**Fig. S1** (a-d) The annealing of the HAO dielectrics by a “Nitrogen-Air-Nitrogen (NAN)” process.

After spin coating (Fig. S1(a)), a finely designed annealing process was used to optimize the quality of the binary metal oxide dielectric film. First, a low-temperature pre-annealing process was introduced to remove the most solvent, which prevents the volatilization process from affecting the densification process of the film. After this, the film was raised to the annealing temperature in a nitrogen atmosphere within a short of time (30 min) (Fig. S1(b)). Next, the air was deliberately introduced and kept for a while (Fig. S1(c)), then it was changed back to the nitrogen (Fig. S1(d)) and naturally cooled to room temperature. For comparison, another dielectric was prepared, whose annealing process was all carried out in nitrogen.

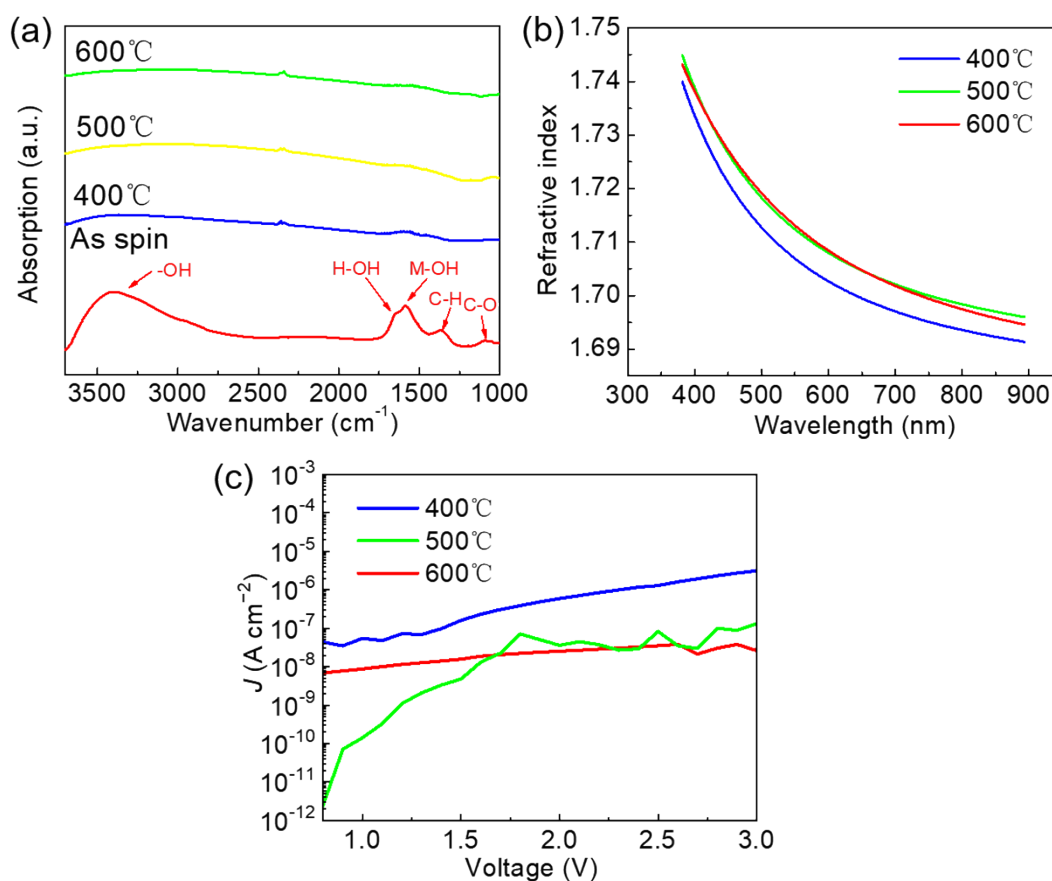

**Fig. S2** (a) FT-IR spectrum of the HAO dielectric prepared by the NAN process with different annealing temperatures. (b) Refractive index of the HAO dielectric processed by the NAN process with different annealing temperatures. (c) Leakage current density of the HAO dielectric processed by the NAN process with different annealing temperatures.

FT-IR data was presented in Fig. S2(a). For the as-spun films, the broad band centered at 3400  $\text{cm}^{-1}$ , the shoulder at 1650  $\text{cm}^{-1}$ , and the peak at 1590  $\text{cm}^{-1}$  are assigned to O-H stretch vibrations associated with hydroxyl groups, the H-OH bending vibration of adsorbed water in the films, and the M-OH stretching vibration, respectively. M stands for Hf or Al. The  $\text{CH}_3$  present in the as-spun film at, 1365  $\text{cm}^{-1}$ , is likely from adsorbed solvent and organic ligand in the HAO dielectric layer. These absorption bands were significantly suppressed or eliminated by annealing at 400°C and above. The refractive index of dielectrics was measured by spectroscopic ellipsometry (Fig. S2(b)), and the refractive index can reflect its density. It showed that the film density was improved as the annealing temperature increased, and the HAO dielectric layer annealed at 500°C and 600°C exhibited similar density. The same phenomenon was also shown in the leakage current curves processed by different annealing temperatures (Fig. S2(c)). When the annealing temperature reached 600°C, the leakage current was not further reduced<sup>30</sup>.

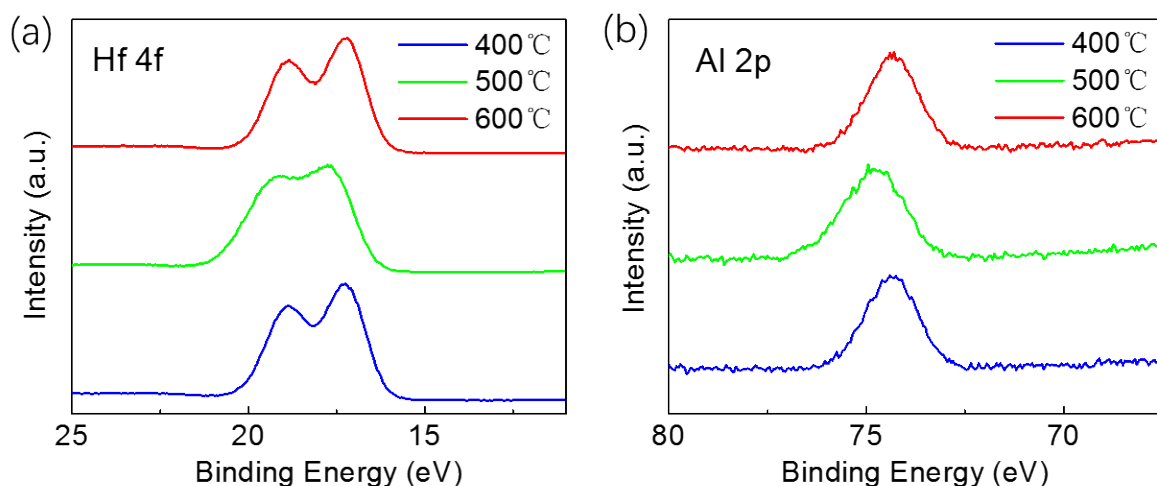

**Fig. S3** (a) Hf 4f XPS spectrum of the HAO dielectric treated by NAN process with different annealing temperatures. (b) Al 2p XPS spectrum of the HAO dielectric treated by NAN process with different annealing temperatures.

To obtain more information on chemical bonding states from HAO dielectrics, the evolution of the Hf 4f core-level XPS spectra related to different annealing temperatures were investigated, as shown in Fig. S3. With the increase of annealing temperature, the doublet peaks corresponding to Hf 4f<sub>5/2</sub> and Hf 4f<sub>7/2</sub> shifted towards higher binding energy sides, indicating the formation of Hf-Al-O. However, When the annealing temperature was increased to 600°C, the binding energy of the Hf 4f peak was detected to shift to the low energy side, which may be due to the decomposition of HfAlO<sub>x</sub> and the partial formation of HfO<sub>x</sub>. The same trend was also observed for Al 2p core-level XPS spectrum.<sup>27,28</sup> Thus, 500°C was adopted as the annealing temperature.

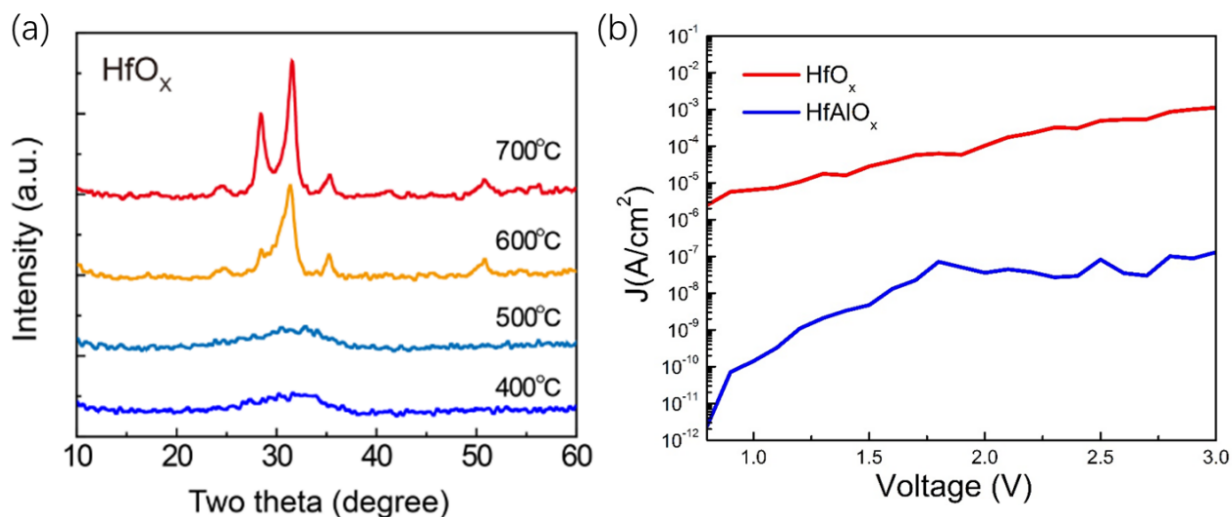

**Fig. S4** (a) XRD patterns of the  $\text{HfO}_x$  dielectric at different annealing temperatures. (b) Comparison of the leakage current of the  $\text{HfO}_x$  and HAO dielectric.

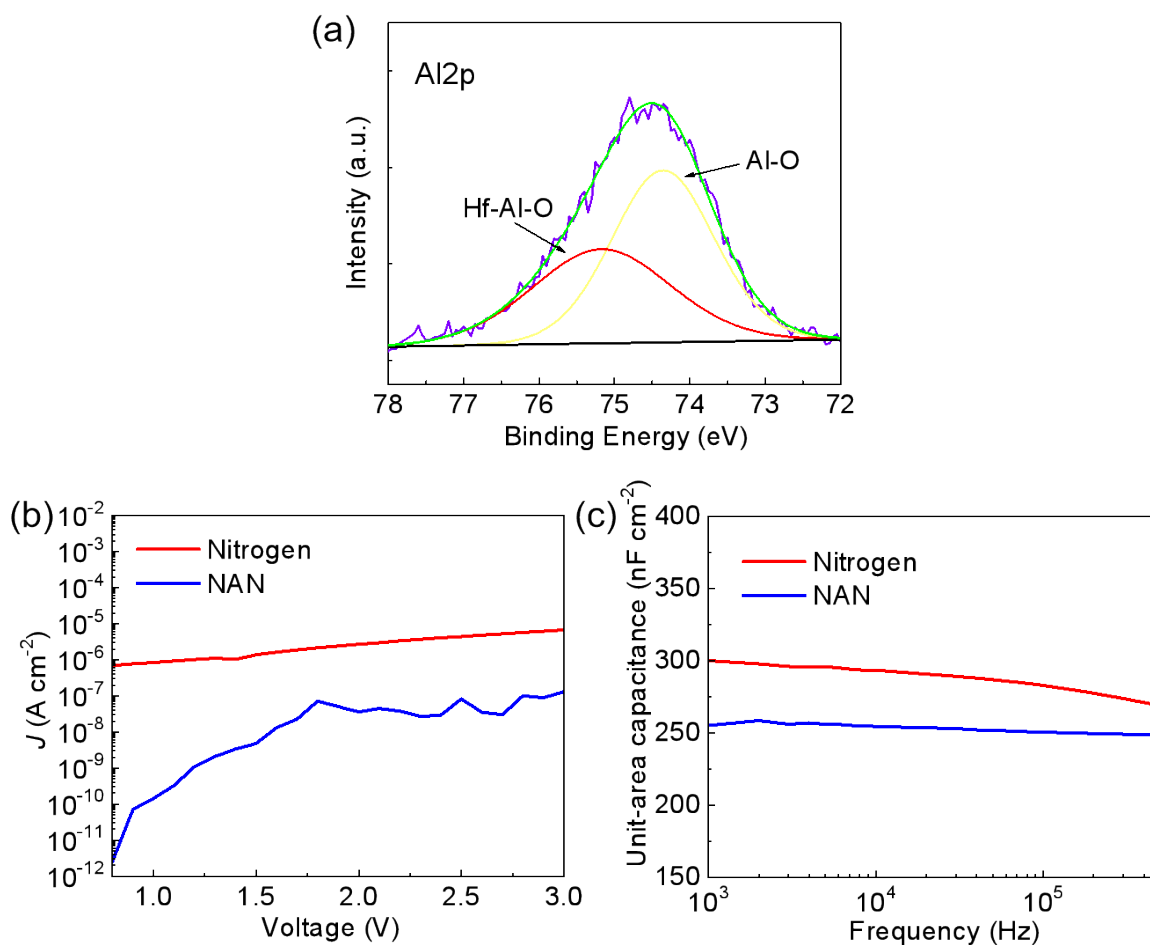

**Fig. S5** (a) Al 2p XPS spectrum of the HAO dielectric treated in nitrogen. (b) Comparison of leakage current of HAO dielectric treated by NAN process and treated in nitrogen. (c) Comparison of unit-area capacitance of HAO dielectric treated by NAN process and treated in nitrogen.



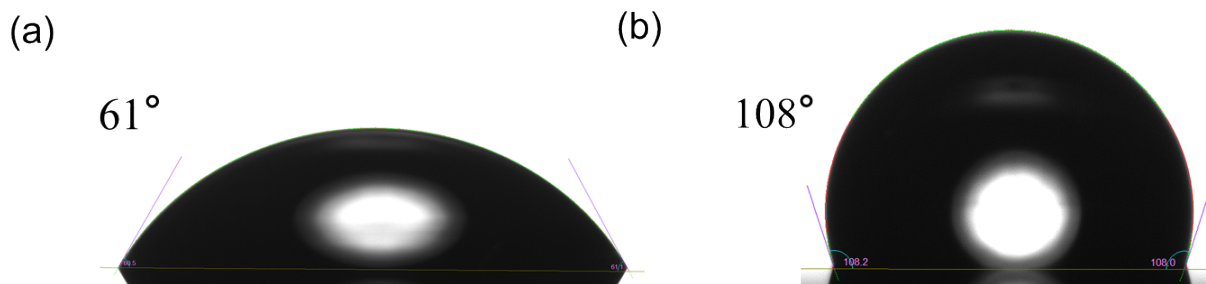

**Fig. S6** (a) Water contact angles of the bare-HAO surface. (b) Water contact angles of the SAM/HAO surface.

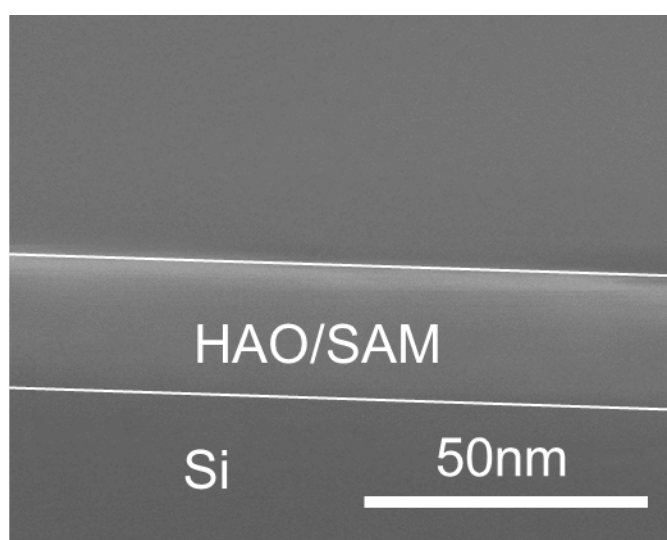

**Fig. S7** Cross-section SEM images of the SAM/HAO dielectric.

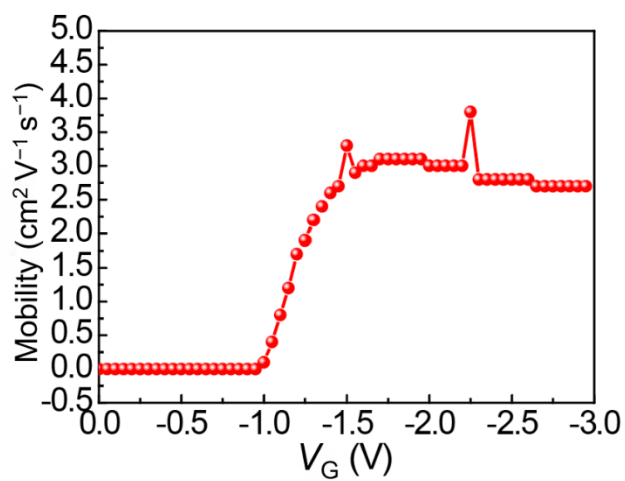

**Fig. S8** Carrier mobility as a function of gate bias. The channel length was 135  $\mu\text{m}$ , and the channel width was 180  $\mu\text{m}$

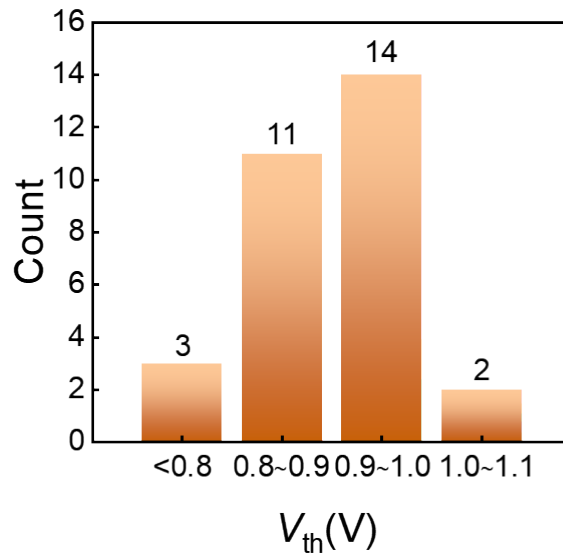

**Fig. S9** (a) Histogram of  $V_{th}$  measured from 30 devices. The channel length was 135  $\mu\text{m}$ , and the channel width was 180  $\mu\text{m}$ .

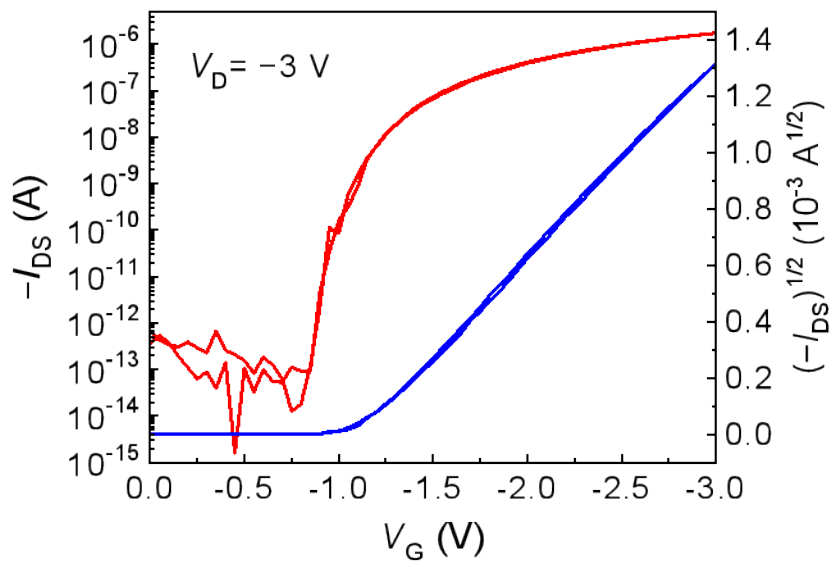

**Fig. S10** Hysteresis characteristics of the OFETs based on C6-DPA 2DMCs and SAM/HAO dielectrics. The channel length was 135  $\mu\text{m}$ , and the channel width was 180  $\mu\text{m}$ .

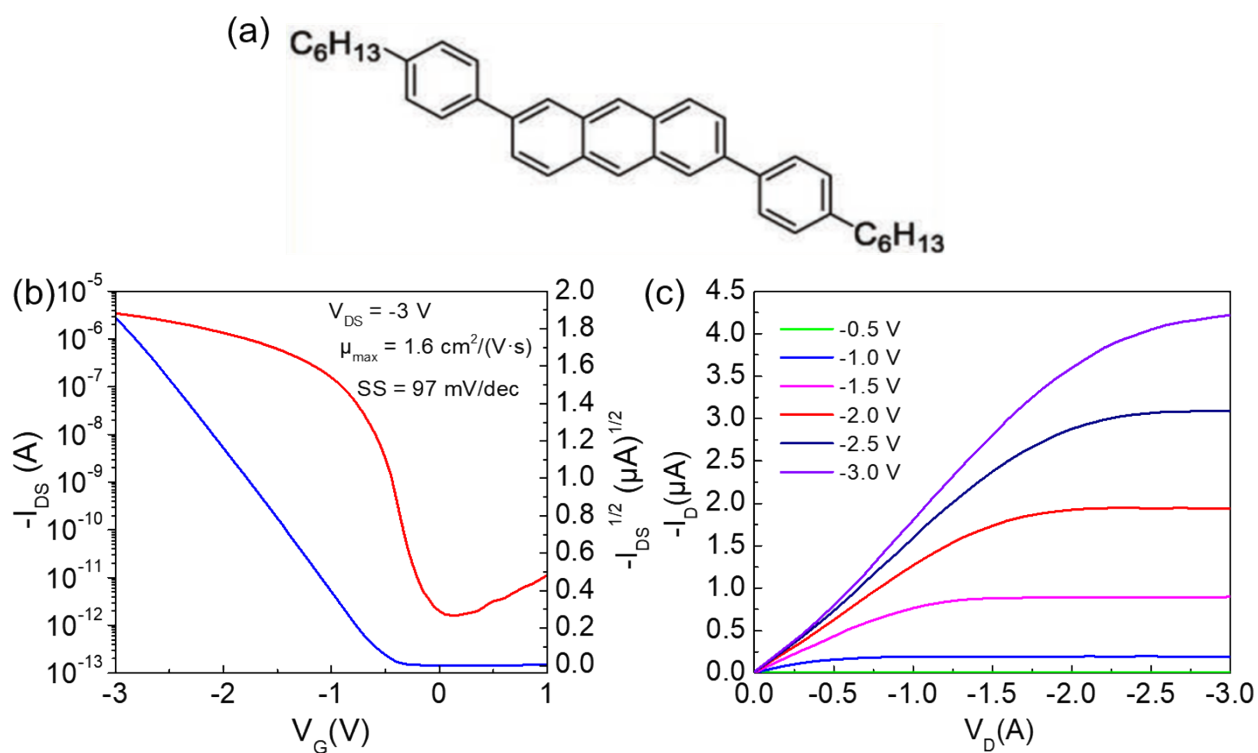

**Fig. S11** (a) Chemical structure of C6-DPA. (b, c) Typical transfer and output characteristics of the OFETs based on C6-DPA 2DMCs and SAM/HAO dielectrics whose bonding mode is not controlled. The channel length was 55  $\mu\text{m}$ , and the channel width was 190  $\mu\text{m}$ .

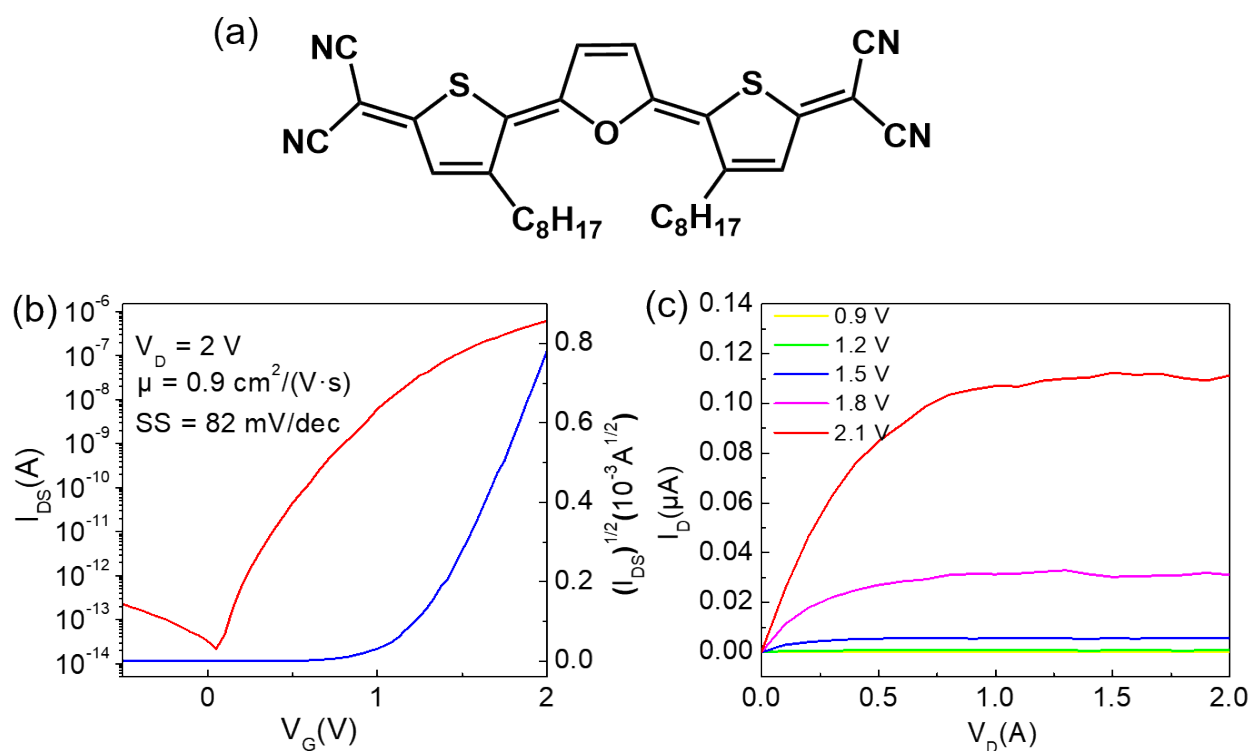

**Fig. S12** (a) Chemical structure of TFT-CN. (b, c) Typical transfer and output characteristics of the OFETs based on TFT-CN 2DMCs and SAM/HAO dielectrics. The channel length was 40  $\mu\text{m}$ , and the channel width was 200  $\mu\text{m}$ .

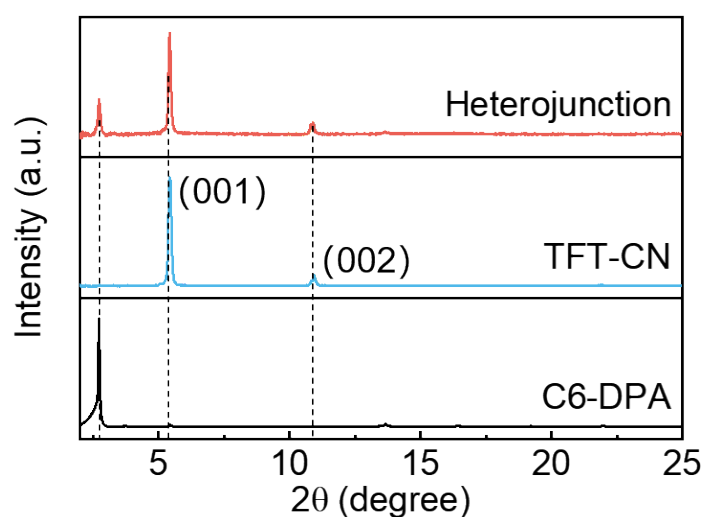

**Fig. S13** XRD patterns of 2DMCs of C6-DPA, TFT-CN, and their p-n heterojunctions.

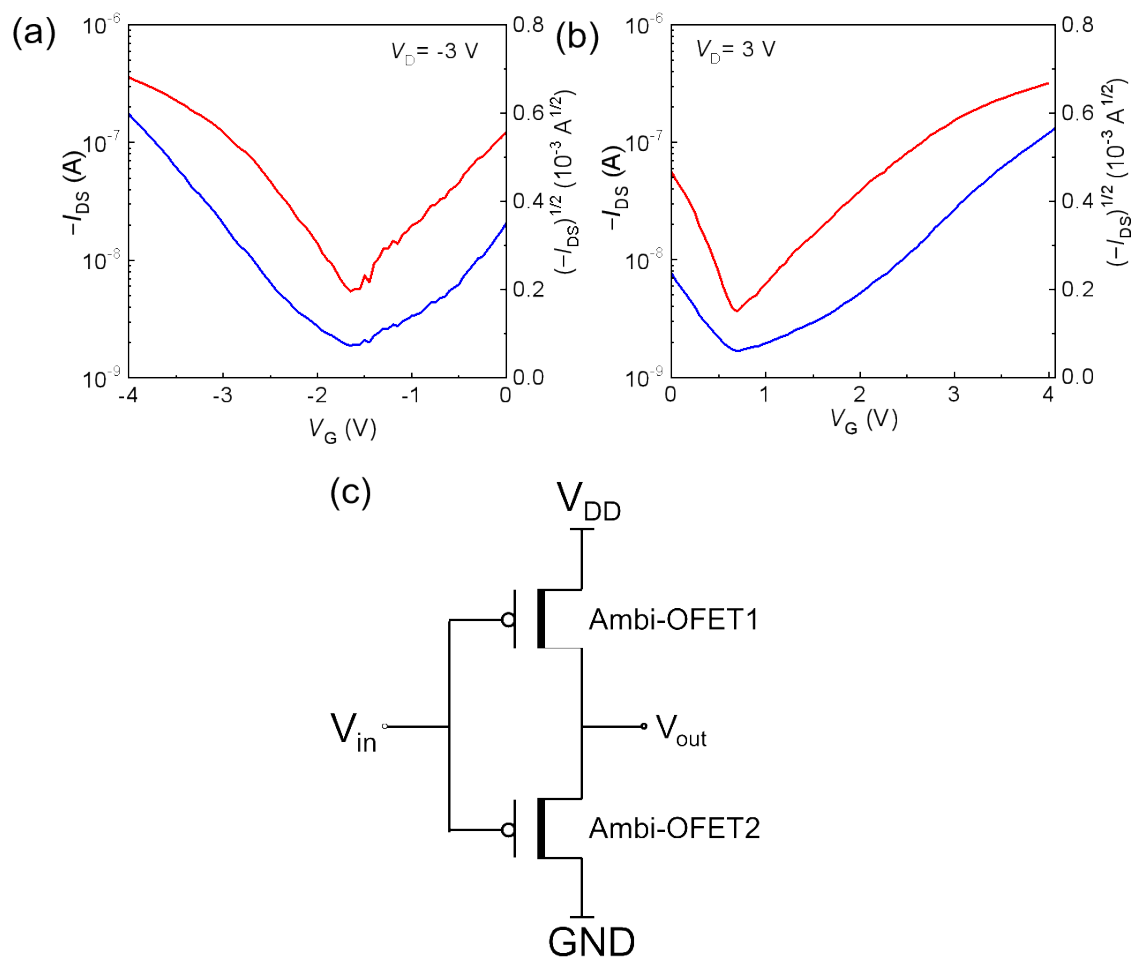

**Fig. S14** (a) Typical transfer curves in the p-channel operation mode of the aOFET. (b) Typical transfer curves in the n-channel operation mode of the aOFET. (c) The circuit schematic of the complementary-like inverter based on aOFETs.

### 3. References

1. F. Yang, L. Sun, J. Han, B. Li, X. Yu, X. Zhang, X. Ren, W. Hu, *ACS Appl. Mater. Interfaces*, 2018, **10**, 25871-25877.
2. S. Sung, S. Park, W. J. Lee, J. Son, C. H. Kim, Y. Kim, Y. Noh, M. H. Yoon, *ACS Appl. Mater. Interfaces*, 2015, **7**, 7456-7461.
3. Q. Mu, Z. Chen, S. Duan, X. Zhang, X. Ren, W. Hu, *Front. Mater.*, 2020, **7**, 570002.
4. Y. Xi, T. Wang, Q. Mu, C. Huang, S. Duan, X. Ren, W. Hu, *Mater. Chem. Front.*, 2021, **5**, 3236-3245.
5. Q. Zhang, G. Xia, W. Xia, J. Zhou, S. Wang, *Synth. Met.*, 2015, **210**, 282-287.
6. D.-K. Kim, M. Lee, B. Kim, J.-H. Choi, *Org. Electron.*, 2019, **74**, 135-143.
7. J. D. Oh, J. W. Kim, D. K. Kim, J. H. Choi, *Org. Electron.*, 2016, **30**, 131-135.
8. Acton, G. Ting, H. Ma, J. W. Ka, H. L. Yip, N. M. Tucker, A. K. Y. Jen, *Adv. Mater.*, 2008, **20**, 3697-3701.
9. W. He, W. Xu, Q. Peng, C. Liu, G. Zhou, S. Wu, M. Zeng, Z. Zhang, J. Gao, X. Gao, et al., *J. of Phys. Chem. C*, 2016, **120**, 9949-9957.
10. J. Liu, H. Zhang, H. Dong, L. Meng, L. Jiang, L. Jiang, Y. Wang, J. Yu, Y. Sun, W. Hu, et al., *Nat. Commun.*, 2015, **6**, 10032.
11. Y. Ito, A. A. Virkar, S. Mannsfeld, J. H. Oh, M. Toney, J. Locklin, Z. Bao, *J. Am. Chem. Soc.*, 2009, **131**, 9396-9404.
12. K. Niimi, M. J. Kang, E. Miyazaki, I. Osaka, K. Takimiya, *Org. Lett.*, 2011, **13**, 3430-3433.
13. S. Duan, T. Wang, B. Geng, X. Gao, C. Li, J. Zhang, Y. Xi, X. Zhang, X. Ren, W. Hu, *Adv. Mater.*, 2020, **32**, 1908388.
14. S. Tatemichi, M. Ichikawa, T. Koyama, Y. Taniguchi, *Appl. Phys. Lett.*, 2006, **89**, 112108.
15. S. Guo, J. Yao, Y. Wang, L. Zhang, F. Zhai, X. Zhang, Y. Feng, W. Feng, X. Zhang, J. Jie, et al., *J. Mater. Chem. C*, 2021, **9**, 5758-5764.
16. S. P. Senanayak, V. K. Sangwan, J. J. McMorro, K. Everaerts, Z. Chen, A. Facchetti, M. C. Hersam, T. J. Marks, K. S. Narayan, *Adv. Electron. Mater.*, 2015, **1**, 1500226.
17. H. Seong, J. Choi, B. C. Jang, M. Kim, S. Yoo, S. Y. Choi, S. G. Im, *Adv. Electron. Mater.*, 2016, **2**, 1500385.
18. J. W. Kim, J. D. Oh, D. K. Kim, H. Y. Lee, Y. G. Ha, J. H. Choi, *J. Mater. Chem. C*, 2016, **4**, 7999-8005.
19. C. Lu, Z. Ji, G. Xu, N. Lu, L. Li, M. Liu, *Org. Electron.*, 2017, **49**, 206-211.
20. H. Jinno, T. Yokota, N. Matsuhisa, M. Kaltenbrunner, Y. Tachibana, T. Someya, *Org. Electron.*, 2017, **40**, 58-64.

21. U. Zschieschang, V. P. Bader, H. Klauk, *Org. Electron.*, 2017, **49**, 179-186.
22. F. C. Wu, B. L. Yeh, T. H. Chou, J. S. Chen, H. L. Cheng, W. Y. Chou, *Org. Electron.*, 2018, **59**, 374-381.
23. E. Stucchi, G. Dell'Erba, P. Colpani, Y.-H. Kim, M. Caironi, *Adv. Electron. Mater.*, 2018, **4**, 1800340.
24. Y. Takeda, Y. Yoshimura, R. Shiwaku, K. Hayasaka, T. Sekine, T. Okamoto, H. Matsui, D. Kumaki, Y. Katayama, S. Tokito, *Adv. Electron. Mater.*, 2018, **4**, 1700313.
25. T. Sawada, T. Makita, A. Yamamura, M. Sasaki, Y. Yoshimura, T. Hayakawa, T. Okamoto, S. Watanabe, S. Kumagai, J. Takeya, *Appl. Phys. Lett.*, 2020, **117**, 033301
26. A. Petritz, A. Wolfberger, A. Fian, T. Griesser, M. Irimia-Vladu, B. Stadlober, *Adv. Mater.*, 2015, **27**, 7645-7656.
27. J. Liu, X. Gao, J. L. Xu, A. Ruotolo, S. D. Wang, *IEEE Electron Device Letters*, 2017, **38**, 1461-1464.
28. S. Tatemichi, M. Ichikawa, S. Kato, T. Koyama, Y. Taniguchi, *Phys. Stat. Sol. RRL*, 2008, **2**, 47-49.
29. S. C. Martens, U. Zschieschang, H. Wadepohl, H. Klauk, L. H. Gade, *Chem. Eur. J.* 2012, **18**, 3498-3509.
30. J. H. Park, Y. B. Yoo, K. H. Lee, W. S. Jang, J. Y. Oh, S. S. Chae, H. K. Baik, *Appl. Mater. Interfaces*, 2013, **5**, 410-417.
31. G. He, L. D. Zhang, G. W. Meng, G. H. Li, Q. Fang, J. P. Zhang, *J. Appl. Phys.*, 2007, **102**, 094103.
32. J. Gao, G. He, M. Liu, J. G. Lv, Z. Q. Sun, C. Y. Zheng, P. Jin, D. Q. Xiao, X. S. Chen, *J. Alloys Compd.*, 2017, **691**, 504-513.
